# Supplementary material
Source: PubMed Central journal article supplement (PMC3034128)

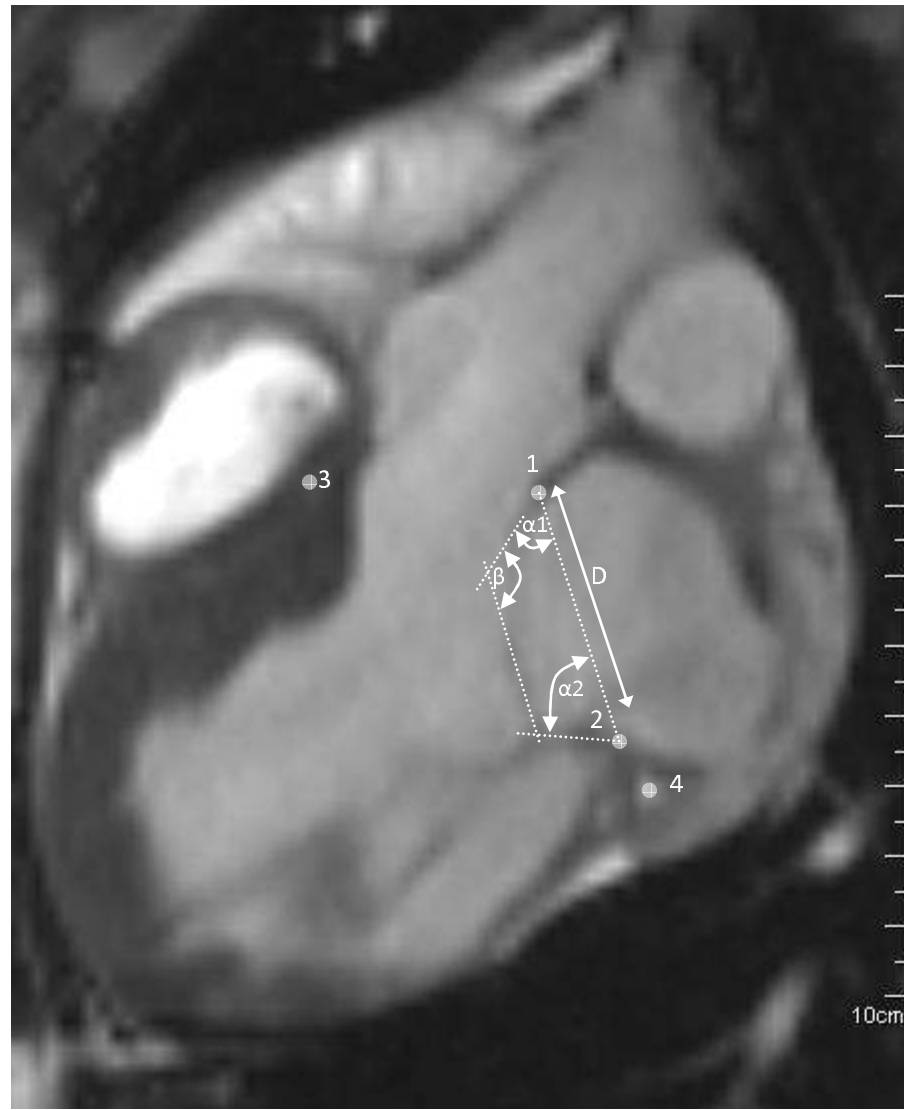

Supplement: NIHMS130368-supplement-supplement_1.pdf [file NIHMS130368-supplement-supplement_1.pdf]
